# Supplementary material for: Chemical and pathogen-induced inflammation disrupt the murine intestinal microbiome
Source: PubMed Central journal article supplement (PMC5408407; doi:10.1186/s40168-017-0264-8), 2017-04-27

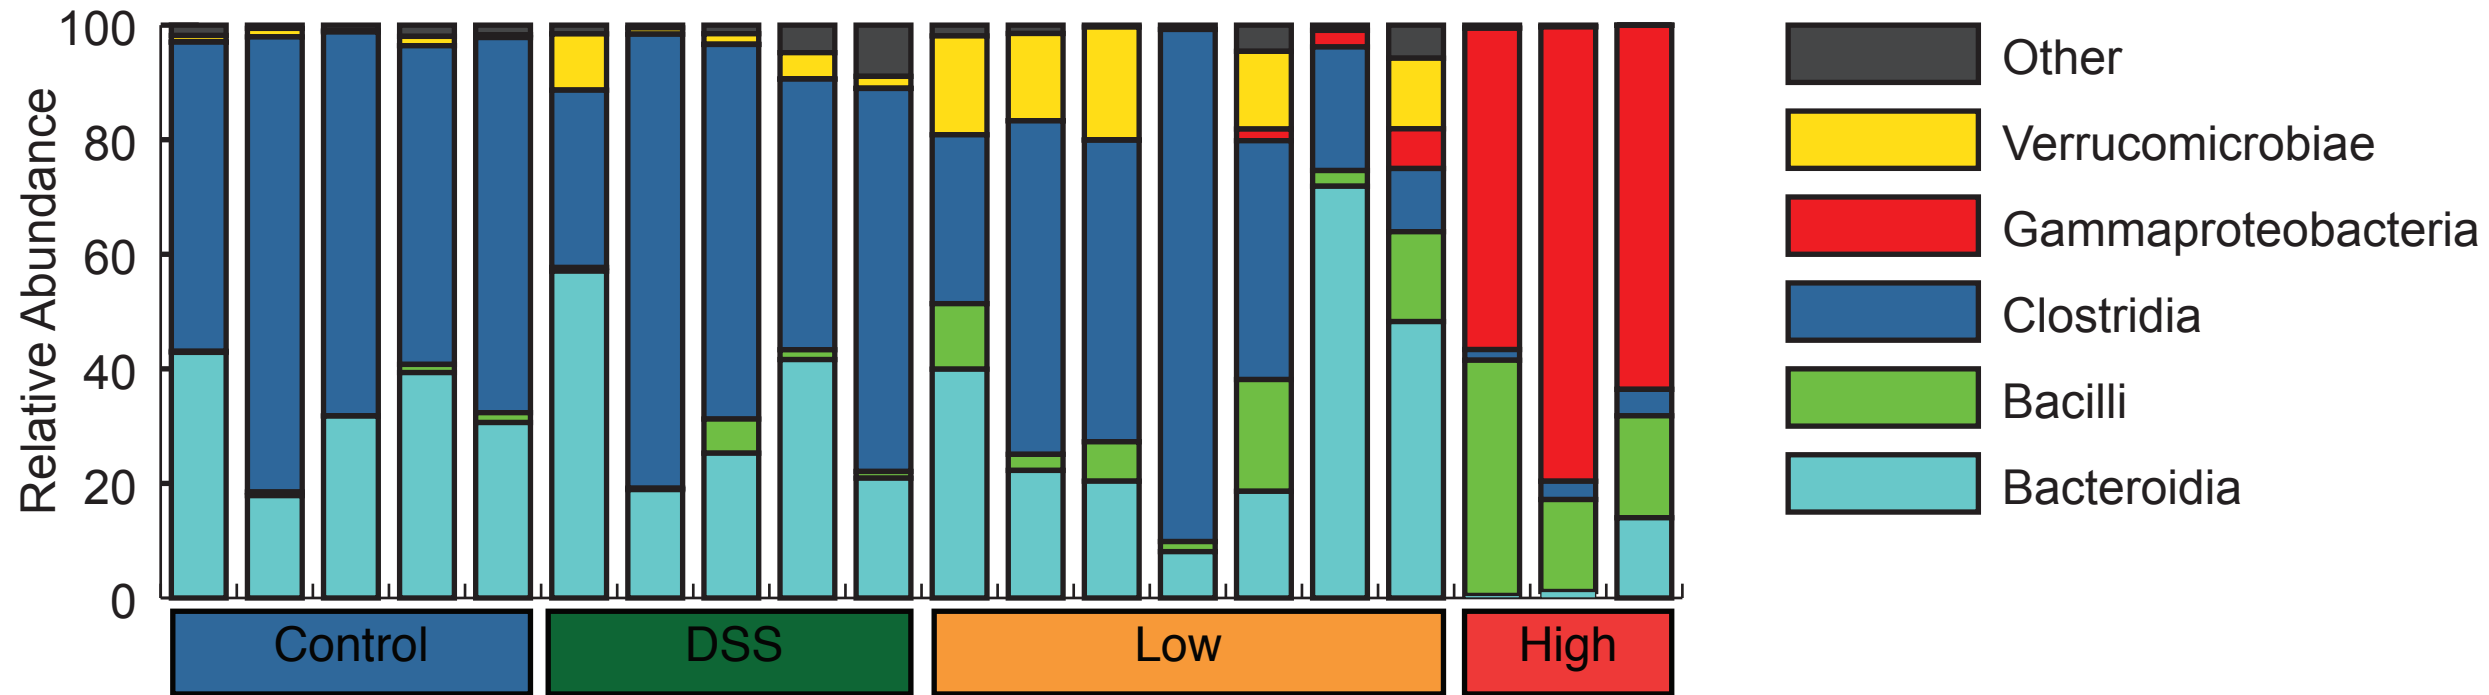

Supplement: 40168_2017_264_MOESM8_ESM.pdf [file 40168_2017_264_MOESM8_ESM.pdf]
